# Supplementary material for: Glucokinase activity controls peripherally located subpopulations of β-cells that lead islet Ca2+ oscillations
Source: eLife. 2025 Feb 12;13:RP103068. doi: 10.7554/eLife.103068 (PMC11820133; doi:10.7554/eLife.103068)
Supplement: Figure 2—source data 1. [file elife-103068-fig2-data1.xlsx]

## Sheet: 2E
Average Cell	Early Phase	Late Phase
0.526611	0.652623	0.529232
0.59019	0.819977	0.372567
0.633636	0.814094	0.549732
0.545383	0.630461	0.589283
0.536363	0.672673	0.454641
0.570719	0.685362	0.552293
0.540848	0.51734	0.694748
0.528838	0.563473	0.694664
0.587663	0.706574	0.610407
0.550591	0.603757	0.718504
0.527345	0.701089	0.509627
0.591342	0.717412	0.639273
0.587015	0.675553	0.557524
0.619425	0.771323	0.414914
0.631658	0.759495	0.615387
0.595702	0.735797	0.624854
0.658852	0.749536	0.585577
0.52015	0.647771	0.43291
0.426199	0.400174	0.530235
0.586084	0.66539	0.584789
0.564818	0.650266	0.632371
0.555533	0.672731	0.593487
0.6002	0.711497	0.675491
0.570307	0.709989	0.549034
0.616805	0.778411	0.5578
0.586577	0.776214	0.365343
0.51514	0.674965	0.547193
0.639195	0.721224	0.686526
0.641385	0.805944	0.57064
0.593491	0.766454	0.538662
0.601114	0.814775	0.497835
0.510707	0.541616	0.64848
0.620658	0.814906	0.459459
0.439336	0.505409	0.586786

## Sheet: 2J
Average Cell	High Degree	Low Degree
0.526611	0.324671	0.621312
0.59019	0.383047	0.76836
0.633636	0.395212	0.782498
0.545383	0.401033	0.708127
0.536363	0.385922	0.682975
0.570719	0.342078	0.713854
0.540848	0.385109	0.696662
0.528838	0.366691	0.652616
0.587663	0.395266	0.75204
0.550591	0.538533	0.579836
0.527345	0.334156	0.636797
0.591342	0.383473	0.706976
0.587015	0.479629	0.717924
0.619425	0.421946	0.794936
0.631658	0.382975	0.767355
0.595702	0.388472	0.737019
0.658852	0.472442	0.776135
0.52015	0.387469	0.667768
0.426199	0.315226	0.517434
0.586084	0.393038	0.673854
0.564818	0.389124	0.691479
0.555533	0.367932	0.647414
0.6002	0.329072	0.718676
0.570307	0.475047	0.727772
0.616805	0.378008	0.810372
0.586577	0.343695	0.77261
0.51514	0.343868	0.64704
0.639195	0.365443	0.820511
0.641385	0.42065	0.790213
0.593491	0.372774	0.752103
0.601114	0.419341	0.72533
0.510707	0.41844	0.575535
0.620658	0.395349	0.762104
0.439336	0.371407	0.50064
