# Supplementary material for: Glucokinase activity controls peripherally located subpopulations of β-cells that lead islet Ca2+ oscillations
Source: eLife. 2025 Feb 12;13:RP103068. doi: 10.7554/eLife.103068 (PMC11820133; doi:10.7554/eLife.103068)
Supplement: Figure 3—source data 1. [file elife-103068-fig3-data1.xlsx]

## Sheet: 3C
Network	Wave
0.872881	0.932
0.702427	0.995349
0.896
0.730198	0.642308
0.747897	0.904959
0.837736	0.49005
0.632546	0.808743
0.891616	0.314394
0.79247	0.484043
0.743893	0.740351
0.81685	0.938889
0.816213	0.601754
0.9274	0.311321
0.877912	0.994318
0.8	0.75
0.806397	0.938144
0.810427	0.961538
0.896774	0.540541
0.925234	0.377778
0.846491	0.988372
0.905882	0.55914
0.921975	0.990991
0.796345	0.173913
0.764815	0.731061
0.695495	0.977528
0.525	0.356061
0.681704	0.907104
0.699695	0.654088
0.776119	0.786667
0.830894	0.795181
0.630781	0.72619
0.853938	0.947674
0.833761	0.521429
0.76748	0.385057
0.873853	0.857639
0.550891	1

## Sheet: 3D
Wave	Network
0.0582767	0.0434838
0.153631	0.0681202
0.344827	0.0216463
0.220094	0.0299737
0.322594	0.0498932
0.272275	0.0161479
0.138256	0.175458
0.108816	0.0332827
0.242399	0.0885312
0.139778	0.0587273
0.00516375	0.0201623
0.129278	0.052851
0.0974782	0.0512599
0.0381735	0.0450346
0.109823	0.00453667
0.0674365	0.0331927
0.319543	0.080613
0.013159	0.07157
0.340755	0.00982269
0.0564256	0.0307688
0.216467	0.0307364
0.115325	0.00926196
0.0817484	0.0092124
0.111571	0.0300698
0.38458	0.0983293
0.353774	0.0633701
0.0430237	0.0384979
0.0600139	0.0566725
0.336031	0.0617052
0.0644762	0.0851609
0.165365	0.105483
0.0801631	0.0376515
0.212769	0.0525388
0.309264	0.147349
0.375575	0.0174563
0.357887	0.074402

## Sheet: 3E
Wave axis change	% Islet
0	0.434783
0.1	0.043478
0.2	0.086957
0.3	0.26087
0.4	0.043478
0.5	0
0.6	0.043478
0.7	0.043478
0.8	0.043478
9	0
1	0
