# Supplementary material for: Glucokinase activity controls peripherally located subpopulations of β-cells that lead islet Ca2+ oscillations
Source: eLife. 2025 Feb 12;13:RP103068. doi: 10.7554/eLife.103068 (PMC11820133; doi:10.7554/eLife.103068)
Supplement: Figure 4—source data 1. [file elife-103068-fig4-data1.xlsx]

## Sheet: 4C
Cellular	Regional
0.126087	0.0441293
0.115264	0.141462
0.0718914	0.0245043
0.285564	0.0769044
0.182165	0.187309
0.0514005	0.0148451
0.177143	0.143982
0.162588	0.0113741
0.103168	0.0125993
0.18748	0.0242328
0.160326	0.0229688
0.160053	0.119779
0.175258	0.0748269
0.0737718	0.0318298
0.222084	0.0261805
0.0693049	0.00221849
0.101087	0.00122782
0.061828	0.0342749
0.289927	0.0409719
0.0503622	0.0157355
0.10542	0.0427535
0.33631	0.10944
0.125871	0.0423355
0.244135	0.00577938
0.211522	0.029762
0.262277	0.16722
0.48223	0.466276
0.157022	0.0326302
0.281102	0.0348699
0.25982	0.272369
0.181763	0.062918
0.168452	0.0148218
0.137445	0.00736415
0.196024	0.00687802

## Sheet: 4D
Cellular	Regional
0.108753	0.0484604
0.0692769	0.121418
0.0901528	0.0816789
0.368811	0.580379
0.147227	0.21835
0.151553	0.194321
0.414183	0.452767
0.328242	0.0941764
0.139404	0.0358491
0.130555	0.0372125
0.126495	0.00504488
0.135974	0.0198492
0.226493	0.599455
0.0565653	0.28288
0.250515	0.802057
0.0520545	0.00392619
0.20122	0.158469
0.113046	0.47181
0.679403	0.667695
0.201536	0.617488
0.178502	0.307128
0.553183	0.481252
0.292502	0.743102
0.717198	0.845283
0.134839	0.340022
0.181416	0.511695
0.261906	0.10435
0.0896612	0.103941
0.201287	0.0578213
0.280241	0.743271
0.157478	0.515444
0.18985	0.0920206
0.127858	0.40916
0.121295	0.09651
