# Supplementary material for: Glucokinase activity controls peripherally located subpopulations of β-cells that lead islet Ca2+ oscillations
Source: eLife. 2025 Feb 12;13:RP103068. doi: 10.7554/eLife.103068 (PMC11820133; doi:10.7554/eLife.103068)
Supplement: Figure 5—source data 1. [file elife-103068-fig5-data1.xlsx]

## Sheet: 5B
3D	1/4 Z-stack	1/2 Z-stack
0.00655394	0.0420093	0.00923962
0.29187	0.260461	0.340686
0.270762	0.00648559	0.575632
0.327318	0.392498	0.472426
0.00224333	0.235682	0.0427451
0.0101042	0.0319234	0.339856
0.281039	0.00498219	0.0982173
0.250318	0.285306	0.602566
0.0317457	0.00922888	0.0698382
	0.926945	0.258173
0.00359923	0.000847746	0.00102557
0.676231	0.545899	0.928141
0.131756	0.865213	0.253107
0.633082	0.608225	0.555169
0.776023	0.00549767	0.750911
0.0395616	0.00481891	0.377213
0.0195157	0.0216712	0.0841818
0.386983	0.00614136	0.231591
0.00483306	0.409578	0.0217761
0.170345	0.102644	0.0510367
0.00916326	0.0767387	0.0256119
0.153124	0.102795	0.0544549
9.55546e-05	0.276541	0.597097
0.287562	0.192259	0.0150509

## Sheet: 5C
3D	Average Cell	High Degree	1/4	Average Cell	High Degree	1/2	Average Cell	High Degree
	0.526611	0.324671		0.52329	0.222162		0.588317	0.397115
	0.59019	0.383047		0.56718	0.40725		0.599018	0.474584
	0.633636	0.395212		0.587062	0.356748		0.671382	0.476742
	0.545383	0.401033		0.542211	0.351003		0.549358	0.376672
	0.499653	0.287277		0.630456	0.407069		0.616025	0.467554
	0.536363	0.385922		0.565447	0.391621		0.455257	0.322042
	0.570719	0.342078		0.617226	0.403873		0.485627	0.271275
	0.540848	0.385109		0.553432	0.378345		0.375296	0.175176
	0.528838	0.366691		0.589351	0.33696		0.502158	0.279256
	0.587663	0.395266		0.608017	0.441099		0.586623	0.358933
	0.550591	0.538533		0.606222	0.493336		0.547363	0.497702
	0.527345	0.334156		0.591257	0.333158		0.609732	0.38158
	0.591342	0.383473		0.67822	0.458019		0.653515	0.437097
	0.619425	0.421946		0.665788	0.548986		0.654059	0.492689
	0.631658	0.382975		0.599637	0.345341		0.480617	0.284576
	0.595702	0.388472		0.6267	0.312383		0.586837	0.364891
	0.658852	0.472442		0.636238	0.483499		0.659755	0.457819
	0.52015	0.387469		0.535599	0.340423		0.445176	0.249131
	0.426199	0.315226		0.621488	0.518502		0.536631	0.40466
	0.586084	0.393038		0.5535	0.383368		0.570357	0.36669
	0.564818	0.389124		0.607195	0.307387		0.560268	0.370817
	0.616805	0.378008		0.607882	0.464139		0.592551	0.410803
	0.586577	0.343695		0.624387	0.431712		0.555438	0.419491
	0.51514	0.343868		0.542771	0.38258		0.496122	0.389861
	0.639195	0.365443		0.558061	0.359422		0.601006	0.377026
	0.641385	0.42065		0.60288	0.342919		0.576525	0.406735
	0.593491	0.372774		0.641238	0.610385		0.585567	0.30986
	0.601114	0.419341		0.627265	0.41395		0.602347	0.348691
	0.510707	0.41844		0.464795	0.358779		0.624434	0.553704
	0.620658	0.395349		0.681634	0.542901		0.626377	0.355865
	0.439336	0.371407		0.478583	0.343547		0.443576	0.357469
	0.555533	0.367932		0.655062	0.507712		0.502326	0.337741
	0.6002	0.329072		0.689893	0.424612		0.597194	0.257281
	0.570307	0.475047		0.534113	0.302261		0.602162	0.382408

## Sheet: 5D
3D	Average Cell	High Phase	1/4	Average Cell	High Phase	1/2	Average Cell	High Phase
	0.526611	0.652623		0.52329	0.732246		0.588317	0.72631
	0.59019	0.819977		0.56718	0.872537		0.599018	0.752036
	0.633636	0.814094		0.587062	0.887561		0.671382	0.785977
	0.545383	0.630461		0.542211	0.593467		0.549358	0.730902
	0.499653	0.637543		0.630456	0.74667		0.616025	0.791521
	0.536363	0.672673		0.565447	0.861085		0.455257	0.714218
	0.570719	0.685362		0.617226	0.838806		0.485627	0.683427
	0.540848	0.51734		0.553432	0.448328		0.375296	0.378048
	0.528838	0.563473		0.589351	0.68643		0.502158	0.590507
	0.587663	0.706574		0.608017	0.569376		0.586623	0.746865
	0.550591	0.603757		0.606222	0.678867		0.547363	0.679713
	0.527345	0.701089		0.591257	0.856203		0.609732	0.833598
	0.591342	0.717412		0.67822	0.848253		0.653515	0.784083
	0.619425	0.771323		0.665788	0.746625		0.654059	0.86454
	0.631658	0.759495		0.599637	0.810444		0.480617	0.476784
	0.595702	0.735797		0.6267	0.753037		0.586837	0.747577
	0.658852	0.749536		0.636238	0.644571		0.659755	0.806785
	0.52015	0.647771		0.535599	0.664191		0.445176	0.692932
	0.426199	0.400174		0.621488	0.595827		0.536631	0.459946
	0.586084	0.66539		0.5535	0.631176		0.570357	0.669169
	0.564818	0.650266		0.607195	0.767865		0.560268	0.666654
	0.616805	0.778411		0.607882	0.720261		0.592551	0.844294
	0.586577	0.776214		0.624387	0.923875		0.555438	0.802018
	0.51514	0.674965		0.542771	0.675792		0.496122	0.782149
	0.639195	0.721224		0.558061	0.771056		0.601006	0.681231
	0.641385	0.805944		0.60288	0.84465		0.576525	0.827996
	0.593491	0.766454		0.641238	0.852123		0.585567	0.79068
	0.601114	0.814775		0.627265	0.890107		0.602347	0.866684
	0.510707	0.541616		0.464795	0.535763		0.624434	0.543844
	0.620658	0.814906		0.681634	0.846418		0.626377	0.90751
	0.439336	0.505409		0.478583	0.536154		0.443576	0.566346
	0.555533	0.672731		0.655062	0.63678		0.502326	0.841493
	0.6002	0.711497		0.689893	0.733554		0.597194	0.769701
	0.570307	0.709989		0.534113	0.79976		0.602162	0.821702

## Sheet: 5E
3D	Cellular	Regional	1/4	Cellular	Regional	1/2	Cellular	Regional
	0.126087	0.0441293		0.118953	0.0436691		0.114633	0.0198574
	0.115264	0.141462		0.146622	0.305011		0.104187	0.180781
	0.0718914	0.0245043		0.0329939	0.0622665		0.334187	0.946495
	0.285564	0.0769044		0.25263	0.281151		0.315582	0.764677
	0.230014	0.0234324		0.289746	0.257178		0.264334	0.333009
	0.182165	0.187309		0.149833	0.361759		0.159368	0.0251559
	0.0514005	0.0148451		0.0808238	0.628953		0.122069	0.800644
	0.177143	0.143982		0.26873	0.301175		0.42864	0.097406
	0.162588	0.0113741		0.174294	0.2705		0.514364	0.453621
	0.103168	0.0125993		0.131239	0.273792		0.160472	0.00981018
	0.18748	0.0242328		0.326682	0.113419		0.148094	0.155144
	0.160326	0.0229688		0.298927	0.0400489		0.175397	0.908172
	0.160053	0.119779		0.199348	0.0736451		0.128285	0.0289884
	0.0737718	0.0318298		0.0731754	0.0675179		0.0564385	0.016652
	0.222084	0.0261805		0.203505	0.142499		0.441312	0.12783
	0.0693049	0.00221849		0.0875632	0.0321047		0.0557339
	0.101087	0.00122782		0.201846	0.0544642		0.280554	0.64999
	0.061828	0.0342749		0.0898629	0.0929495		0.0542301	0.676811
	0.289927	0.0409719		0.379458	0.456816		0.829894	0.363085
	0.0503622	0.0157355		0.0964533	0.114153		0.246809	0.860518
	0.10542	0.0427535		0.0537774	0.0541825		0.30372	0.132479
	0.211522	0.029762		0.238819	0.210171		0.181732
	0.262277	0.16722		0.191707	0.25526		0.195976	0.531776
	0.48223	0.466276		0.414892	0.132944		0.241969	0.0438088
	0.157022	0.0326302		0.151112	0.251223		0.111542	0.490243
	0.281102	0.0348699		0.291966	0.0463466		0.188643	0.00713534
	0.25982	0.272369		0.278247	0.174522		0.313366	0.650378
	0.181763	0.062918		0.272115	0.126949		0.100827	0.00272764
	0.168452	0.0148218		0.183535	0.145149		0.238408	0.32507
	0.137445	0.00736415		0.199884	0.469727		0.216041	0.788973
	0.196024	0.00687802		0.225191	0.129302		0.126677	0.188578
	0.33631	0.10944		0.376999	0.269302		0.34816	0.372732
	0.125871	0.0423355		0.156348	0.49715		0.302196	0.03591
	0.244135	0.00577938		0.444685	0.0882903		0.472801	0.29723

## Sheet: 5F
3D	Cellular	Regional	1/4	Cellular	Regional	1/2	Cellular	Regional
	0.109117	0.0486226		0.0815407	0.0930762		0.152692	0.125874
	0.0685359	0.120119		0.0826018	0.332296		0.107161	0.491727
	0.090805	0.0822698		0.176754	0.00347977		0.057606	0.180382
	0.369005	0.580684		0.301655	0.34928		0.243482	0.062716
	0.253963	0.147009		0.375352	0.701635		0.374609	0.424633
	0.14697	0.217969		0.204808	0.0025784		0.207228	0.525552
	0.151503	0.194257		0.145659	0.0438744		0.0654466	0.0835206
	0.41328	0.451781		0.510266	0.458865		0.138306	0.178215
	0.327103	0.0938499		0.328848	0.200957		0.115631	0.116072
	0.139174	0.03579		0.144353	0.337248		0.104202	0.324468
	0.130644	0.037238		0.140129	0.0792007		0.23493	0.103139
	0.124932	0.00498254		0.154609			0.109739	0.0255162
	0.136315	0.019899		0.190407	0.339012		0.163522	0.131781
	0.0562844	0.281475		0.0394277	0.0553731		0.0546647	0.144342
	0.25033	0.801466		0.343536	0.00755764		0.177691	0.0170831
	0.0517918	0.00390638		0.0587902			0.0361525	0.023249
	0.200517	0.157915		0.305304	0.670866		0.0844566	0.0547623
	0.112112	0.467912		0.186974	0.821111		0.0908535	0.220107
	0.682859	0.671091		0.655737	0.754608		0.330473	0.440868
	0.200453	0.61417		0.143176	0.0726604		0.0498069	0.0971582
	0.177963	0.3062		0.206773	0.00841408		0.122423	0.36297
	0.134935	0.340262		0.122744	0.0220763		0.109868	0.168274
	0.182644	0.51516		0.171336	0.221268		0.190967	0.492387
	0.265812	0.105907		0.42304	0.603675		0.511468	0.506833
	0.08987	0.104183		0.126273	0.315669		0.211449	0.618216
	0.201181	0.0577909		0.26246	0.919879		0.291404	0.622865
	0.27585	0.731625		0.389329	0.671661		0.201926	0.143389
	0.157016	0.513932		0.262568	1.10305		0.18225	0.0520702
	0.190048	0.0921169		0.24714	0.446914		0.238274	0.688275
	0.128133	0.410037		0.108856	0.224957		0.165243	0.0127559
	0.120358	0.0957643		0.141904	0.511911		0.212154	0.0855571
	0.553369	0.481413		0.561664	0.654402		0.433883	0.401356
	0.292604	0.743362		0.278217	1.03568		0.0945852	0.0488031
	0.716402	0.844346		0.686744	1.15433		0.150143	0.052289
