# Supplementary material for: Glucokinase activity controls peripherally located subpopulations of β-cells that lead islet Ca2+ oscillations
Source: eLife. 2025 Feb 12;13:RP103068. doi: 10.7554/eLife.103068 (PMC11820133; doi:10.7554/eLife.103068)
Supplement: Figure 6—source data 1. [file elife-103068-fig6-data1.xlsx]

## Sheet: 6C
Period	Con	Veh	Active phase	Con	Veh	Silent phase	Con	Veh	Duty cycle	Con	Veh
	213.612	300.285		88.3859	113.324		125.226	186.961		0.419	0.3789
	339.467	287.728		201.891	169.551		137.576	118.177		0.5948	0.5858
	413.892	333.538		137.926	128.768		275.965	204.77		0.3403	0.3865
	355.521	276.307		147.621	125.817		207.9	150.489		0.4207	0.4557
	446.471	412.317		175.599	182.635		270.872	229.683		0.3938	0.443
	538.067	484.334		205.806	238.047		332.26	246.287		0.3835	0.4915
	566.444	400.213		217.973	198.853		348.471	201.36		0.3877	0.4971
	438.659	368.396		161.963	155.113		276.697	213.283		0.3711	0.4208
	395.467	363.787		162.433	158.836		233.034	204.951		0.4118	0.4378
	526.738	494.238		195.576	213.436		331.163	280.802		0.3714	0.4352
	422.206	378.23		138.421	144.263		283.785	233.967		0.3281	0.3814
	932.872	410.254		191.397	145.305		741.475	264.949		0.2052	0.3779

## Sheet: 6D
Period	Veh	GKa	Active phase	Veh	GKa	Silent phase	Veh	GKa	Duty cycle	Veh	GKa
	481.043	624.301		156.108	261.698		324.935	362.603		0.324467	0.421295
	392.599	407.782		137.145	203.489		255.455	204.292		0.353248	0.488863
	484.015	601.078		176.734	306.28		307.281	294.799		0.3656	0.51353
	387.125	786.676		131.469	574.763		255.656	211.913		0.344204	0.654954
	374.809	399.374		128.715	168.049		246.094	231.326		0.345511	0.421238
	408.273	630.79		132.058	253.972		276.216	376.818		0.337299	0.402645
	549.316	815.104		193.16	494.33		356.156	320.774		0.364535	0.606463
	632.487	597.807		209.252	312.42		423.235	285.387		0.328745	0.522415

## Sheet: 6E
Period	Veh	PKa	Active phase	Veh	PKa	Silent phase	Con	Veh	Duty cycle	Veh	PKa
	482.007	482.023		149.146	149.16		125.226	186.961		0.3218	0.3218
	500.926	256.683		342.233	138.789		137.576	118.177		0.6366	0.5265
	416.602	275.27		166.08	90.5858		275.965	204.77		0.3987	0.3034
	443.005	328.872		167.338	122.053		207.9	150.489		0.3777	0.372
	441.63	291.677		180.488	154.106		270.872	229.683		0.4074	0.5196
	407.454	302.386		158.978	126.183		332.26	246.287		0.3902	0.4183
	576.125	314.635		182.974	148.043		348.471	201.36		0.3204	0.4767
	426.774	242.299		146.126	93.2654		276.697	213.283		0.3427	0.3892
	357.502	200.292		134.736	75.5168		233.034	204.951		0.3777	0.3609
	346.895	275.558		145.817	124.947		331.163	280.802		0.426	0.454
	494.144	478.916		160.125	172.279		283.785	233.967		0.324	0.36
	673.904	338.641		196.248	154.778		741.475	264.949		0.2912	0.4681
	405.811	166.885		104.255	90.9132					0.2557	0.545
