# Supplementary material for: Glucokinase activity controls peripherally located subpopulations of β-cells that lead islet Ca2+ oscillations
Source: eLife. 2025 Feb 12;13:RP103068. doi: 10.7554/eLife.103068 (PMC11820133; doi:10.7554/eLife.103068)
Supplement: Figure 7—figure supplement 1—source data 1. [file elife-103068-fig7-figsupp1-data1.xlsx]

## Sheet: 1A
Vehicle	Pre-	Veh	Gka	Pre-	GKa	Pka	Pre-	PKa
	0.0441293	0.00819948		0.0318298	0.0744082		0.10944	0.0124127
	0.141462	0.0750568		0.0261805	0.0982236		0.0423355	0.0222004
	0.0245043	0.0419944		0.00221849	0.0768598		0.00577938	0.0161967
	0.0769044	0.0236944		0.00122782	0.0197769		0.029762	0.0296143
	0.187309	0.0414663		0.0342749	0.103498		0.16722	0.0163918
	0.0148451	0.0139529		0.0409719	0.0329812		0.466276	0.0190661
	0.143982	0.069891		0.0157355	0.00526459		0.0326302	0.0223853
	0.0113741	0.0964003		0.0427535	0.00659843		0.0348699	0.0618626
	0.0125993	0.037141					0.272369	0.0250235
	0.0242328	0.00267874					0.062918	0.0199365
	0.0229688	0.0131065					0.0148218	0.782606
	0.119779	0.076456					0.00736415	0.054426
	0.0748269	0.549441					0.00687802	0.013303

## Sheet: 1B
Vehicle	Pre-	Veh	Gka	Pre-	GKa	Pka	Pre-	PKa
	0.643434	0.667677		0.702381	0.690476		0.465517	0.66092
	0.490588	0.631765		0.549828	0.419244		0.677193	0.62807
	0.642857	0.571429		0.5	0.538462		0.666667	0.5
	0.496104	0.627273		0.675676	0.5		0.636364	0.636364
	0.404372	0.508197		0.662921	0.58427		0.456929	0.659176
	0.651515	0.700758		0.569767	0.523256		0.291667	0.670455
	0.397163	0.480496		0.567029	0.701087		0.666667	0.57377
	0.689474	0.580702		0.765766	0.738739		0.57619	0.469841
	0.677778	0.622222		0.586957	0.641304		0.506944	0.5
	0.656028	0.742908					0.62249	0.73494
	0.575472	0.669811					0.584337	0.373494
	0.582375	0.622605					0.678431	0.676471
	0.546667	0.305					0.676259	0.796403

## Sheet: 1C
Vehicle	Pre-	Veh	Gka	Pre-	GKa	Pka	Pre-	PKa
	0.915607	0.925296		0.843233	0.937267		0.805619	0.965352
	0.88573	0.912498		0.982759	0.994286		0.936878	0.968959
	0.906883	0.955466		0.955326	0.957627		0.927419	0.986395
	0.84414	0.896525		0.94586	0.963636		0.86402	0.863014
	0.855421	0.889132		0.877273	0.964286		0.901465	0.856941
	0.92475	0.93283		0.947597	0.976733		0.965994	0.955835
	0.960056	0.915998		0.952303	0.946128		0.892644	0.906299
	0.983104	0.9626		0.977564	0.903955		0.91742	0.981059
	0.920866	0.951626					0.931252	0.860508
	0.901566	0.939394					0.978705	0.95148
	0.933962	0.931751					0.905285	0.913637
	0.928177	0.958214					0.939205	0.92648
	0.927047	0.941222					0.947851	0.959717
