# Supplementary material for: Glucokinase activity controls peripherally located subpopulations of β-cells that lead islet Ca2+ oscillations
Source: eLife. 2025 Feb 12;13:RP103068. doi: 10.7554/eLife.103068 (PMC11820133; doi:10.7554/eLife.103068)
Supplement: Figure 7—source data 1. [file elife-103068-fig7-data1.xlsx]

## Sheet: 7B
Vehicle	Pre-	Veh	Gka	Pre-	GKa	Pka	Pre-	PKa
	0.0484604	0.653094		0.28288	0.0654563		0.481252	1.08513
	0.121418	0.101525		0.802057	0.0192056		0.743102	0.171717
	0.0816789	0.0244479		0.00392619	0.014599		0.845283	0.0132114
	0.580379	0.752707		0.158469	0.00487268		0.340022	0.339845
	0.21835	0.491358		0.47181	0.00129677		0.511695	0.607457
	0.194321	0.0179539		0.667695	0.443035		0.10435	0.181382
	0.452767	0.0150268		0.617488	0.0104243		0.103941	0.065713
	0.0941764	0.603699		0.307128	0.186893		0.0578213	0.00807618
	0.0358491	0.0131761					0.743271	0.55481
	0.0372125	0.00914486					0.515444	0.00806139
	0.00504488	0.000718648					0.0920206	0.181511
	0.0198492	0.284728					0.40916	0.605454
	0.599455	0.873286					0.09651	0.00317032

## Sheet: 7C
Vehicle	Pre-	Veh	Gka	Pre-	GKa	Pka	Pre-	PKa
	0.0122922	0.129475		0.0930422	0.0732288		0.015841	0.0161001
	0.453651	0.448746		0.344184	0.0250808		0.612404	0.00537009
	0.766104	1.31612		0.00136614	0.0658458		0.0161369	0.0600436
	0.629161	0.171415		1.23618	0.0131091		0.0344894	0.186233
	0.452592	0.175911		0.337382	0.235513		0.136194	0.0230545
	0.130885	0.875958		0.739876	0.401294		0.65965	0.401446
	0.803079	0.0330564		1.00026	0.0151299		0.17602	0.691994
	0.0406683	0.130149		0.502809	0.113531		0.0421068	0.062252
	0.87765	0.0211239					0.0088431	0.0158095
	0.002598	0.000664269					0.013062	0.0063302
	0.00970005	0.000370881					0.160193	0.15965
	0.028597	0.280869					0.01976	0.0959812
	0.679207	0.413278					0.600956	0.0887198

## Sheet: 7D
Vehicle	Pre-	Veh	Gka	Pre-	GKa	Pka	Pre-	PKa
	0.733333	0.607071		0.711806	0.625		0.269006	0.380117
	0.744706	0.738824		0.470588	0.745098		0.519298	0.554386
	0.724638	0.463768		0.726027	0.767123		0.0512821	0.75641
	0.457143	0.436364		0.516854	0.730337		0.670498	0.670498
	0.611111	0.505556		0.470588	0.8		0.450758	0.590909
	0.544061	0.570881		0.175725	0.45471		0.417625	0.436782
	0.458781	0.772401		0.427273	0.663636		0.655556	0.622222
	0.400709	0.315603		0.472527	0.43956		0.609524	0.820635
	0.59887	0.79096					0.444444	0.395833
	0.636525	0.760638					0.711382	0.707317
	0.742857	0.857143					0.590361	0.487952
	0.726054	0.557471					0.735294	0.635294
	0.519167	0.150833					0.539568	0.855396

## Sheet: 7E
Vehicle	Pre-	Veh	Gka	Pre-	GKa	Pka	Pre-	PKa
	0.738	0.725		0.701031	0.656357		0.16092	0.425287
	0.754651	0.683721		0.288462	0.576923		0.597222	0.534722
	0.628571	0.628571		0.675676	0.310811		0.443038	0.810127
	0.411538	0.489744		0.633333	0.644444		0.560606	0.556818
	0.595628	0.497268		0.627907	0.511628		0.629213	0.771536
	0.731061	0.609848		0.311828	0.437276		0.325758	0.431818
	0.384752	0.695035		0.567568	0.675676		0.699454	0.612022
	0.636842	0.549123		0.597826	0.652174		0.573899	0.523585
	0.711111	0.788889					0.5	0.48
	0.72807	0.875439					0.578313	0.7751
	0.5	0.877358					0.64881	0.678571
	0.583333	0.503788					0.627907	0.505814
	0.41405	0.323967					0.552143	0.825714

## Sheet: 7F
Vehicle	Pre-	Veh	Gka	Pre-	GKa	Pka	Pre-	PKa
	9.77242	12.3613		14.0895	12.922		41.8778	12.1324
	24.6805	21.8721		8.85668	24.4871		10.9817	9.27696
	15.7312	16.7348		24.506	56.2388		12.9376	15.1274
	10.5832	14.078		23.2546	26.0631		16.3792	16.3776
	24.4227	31.9369		19.9852	31.0751		23.9518	27.0946
	29.784	33.5437		22.7833	26.0566		18.8204	10.4154
	14.8388	19.2978		9.19346	31.2767		22.7014	15.6536
	25.5299	21.0998		22.6904	85.8947		23.5355	19.3079
	15.5312	16.6667					13.1058	10.2069
	26.8793	26.9449					17.9928	24.7407
	12.5204	17.2401					22.0465	109.04
	16.5935	20.0149					21.6875	16.4976
							34.3388	54.0026
